# Supplementary material for: polo Is Identified as a Suppressor of bubR1 Nondisjunction in a Deficiency Screen of the Third Chromosome in Drosophila melanogaster
Source: PubMed Central journal article supplement (PMC3276128; doi:10.1534/g3.111.000265), 2011-07-01
Supplement: supp_1.2.161_TableS1.pdf [file supp_1.2.161_TableS1.pdf]

**Table S1 Third chromosome deficiencies that do not affect *bubR1* X NDJ**

| Deficiency name       | Cytogenetic breakpoints | Normal progeny | Exceptional progeny |      | Total adjusted progeny | X NDJ   | d With matched control <sup>(a)</sup> | d With average control <sup>(b)</sup> |
|-----------------------|-------------------------|----------------|---------------------|------|------------------------|---------|---------------------------------------|---------------------------------------|
|                       |                         | X/XY & X/O     | XX/O                | O/XY |                        |         |                                       |                                       |
| <i>Df(3L)emc-E12</i>  | 61A;61D3                | 258            | 56                  | 6    | 382                    | 32.46%  | -2.74%                                | 6.64%                                 |
| <i>Df(3L)Ar14-8</i>   | 61C5-8;62A8             | 993            | 126                 | 28   | 1301                   | 23.67%* | 4.17%                                 | -2.15%                                |
| <i>Df(3L)Aprt-1</i>   | 62A10-B1;62D2-5         | 778            | 107                 | 36   | 1064                   | 26.88%  | 2.34%                                 | 1.06%                                 |
| <i>Df(3L)R-G7</i>     | 62B7;62E5-6             | 402            | 82                  | 15   | 596                    | 32.55%  | -0.23%                                | 6.73%                                 |
| <i>Df(3L)GN34</i>     | 63E6-9;64A8-9           | 332            | 26                  | 10   | 404                    | 17.82%  | -5.17%                                | -8.00%                                |
| <i>Df(3L)ED4342</i>   | 64A12;64B12             | 756            | 151                 | 31   | 1120                   | 32.50%  | 3.64%                                 | 6.68%                                 |
| <i>Df(3L)XDI98</i>    | 65A2;65E1               | 837            | 130                 | 21   | 1139                   | 26.51%  | 1.51%                                 | 0.69%                                 |
| <i>Df(3L)BSC27</i>    | 65D4-5;65E4-6           | 895            | 107                 | 30   | 1169                   | 23.44%  | -1.10%                                | -2.38%                                |
| <i>Df(3L)BSC33</i>    | 65E10-F1;65F2-6         | 959            | 196                 | 12   | 1375                   | 30.25%* | 5.25%                                 | 4.43%                                 |
| <i>Df(3L)66C-G28</i>  | 66B8-9;66C9-10          | 754            | 136                 | 16   | 1058                   | 28.73%* | -6.47%                                | 2.91%                                 |
| <i>Df(3L)h-i22</i>    | 66D10-11;66E1-2         | 459            | 51                  | 16   | 593                    | 22.60%  | -0.39%                                | -3.22%                                |
| <i>Df(3L)Scf-R6</i>   | 66E1-6;66F1-6           | 1071           | 189                 | 30   | 1509                   | 29.03%  | -2.25%                                | 3.21%                                 |
| <i>Df(3L)BSC35</i>    | 66F1-2;67B2-3           | 142            | 27                  | 7    | 210                    | 32.38%  | -0.40%                                | 6.56%                                 |
| <i>Df(3L)eyg[C1]</i>  | 69A4-5;69D4-6           | 664            | 107                 | 20   | 918                    | 27.67%  | 0.26%                                 | 1.85%                                 |
| <i>Df(3L)BSC12</i>    | 69F6-70A1;70A1-2        | 584            | 86                  | 19   | 794                    | 26.45%  | 3.46%                                 | 0.63%                                 |
| <i>Df(3L)jz-GF3b</i>  | 70C1-2;70D4-5           | 75             | 10                  | 5    | 105                    | 28.57%  | 0.51%                                 | 2.75%                                 |
| <i>Df(3L)jz-M21</i>   | 70D2-3;71E4-5           | 1368           | 154                 | 38   | 1752                   | 21.92%  | -0.84%                                | -3.90%                                |
| <i>Df(3L)Cat</i>      | 75B4-7;75E2             | 354            | 29                  | 19   | 450                    | 21.33%  | -3.20%                                | -4.49%                                |
| <i>Df(3L)jz2</i>      | 75F10-11;76A1-5         | 537            | 41                  | 15   | 649                    | 17.26%  | 0.66%                                 | -8.56%                                |
| <i>Df(3L)ED4782</i>   | 75F2;76A1               | 911            | 101                 | 14   | 1141                   | 20.16%  | -4.38%                                | -5.66%                                |
| <i>Df(3L)BSC20</i>    | 76A7-B1;76B4-5          | 146            | 47                  | 5    | 250                    | 41.60%  | 6.40%                                 | 15.78%                                |
| <i>Df(3L)ri-Xt1</i>   | 77E2-4;78A2-4           | 801            | 109                 | 18   | 1055                   | 24.08%* | 4.57%                                 | -1.74%                                |
| <i>Df(3L)HD1</i>      | 79D3-E1;79F3-6          | 1209           | 130                 | 41   | 1551                   | 22.05%  | -1.31%                                | -3.77%                                |
| <i>Df(3L)BSC21</i>    | 79E5-F1;80A2-3          | 171            | 25                  | 5    | 231                    | 25.97%  | -2.09%                                | 0.15%                                 |
| <i>Df(3R)ME15</i>     | 81F3-6;82F5-7           | 459            | 83                  | 21   | 667                    | 31.18%  | 3.12%                                 | 5.36%                                 |
| <i>Df(3R)3-4</i>      | 82F3-4;82F10-11         | 570            | 114                 | 25   | 848                    | 32.78%  | 4.72%                                 | 6.96%                                 |
| <i>Df(3R)e1025-14</i> | 82F8-10;83A1-3          | 748            | 99                  | 26   | 998                    | 25.05%  | 0.51%                                 | -0.77%                                |

|                        |                  |      |     |    |      |        |        |        |
|------------------------|------------------|------|-----|----|------|--------|--------|--------|
| <i>Df(3R)BSC47</i>     | 83B7-C1;83C6-D1  | 520  | 64  | 19 | 686  | 24.20% | -3.21% | -1.62% |
| <i>Df(3R)roe</i>       | 84A6-B1;84D4-9   | 926  | 120 | 34 | 1234 | 24.96% | -3.90% | -0.86% |
| <i>Df(3R)Cha7</i>      | 90F1-4;91F5      | 1605 | 133 | 30 | 1931 | 16.88% | -2.62% | -8.94% |
| <i>Df(3R)BSC43</i>     | 92F7-93A1;93B3-6 | 549  | 77  | 11 | 725  | 24.28% | 4.77%  | -1.54% |
| <i>Df(3R)e-N19</i>     | 93B;94           | 929  | 174 | 40 | 1357 | 31.54% | 0.26%  | 5.72%  |
| <i>Df(3R)ED6093</i>    | 94A2;94C4        | 864  | 101 | 33 | 1132 | 23.67% | -5.19% | -2.15% |
| <i>Df(3R)Exel6192</i>  | 94B11;94D3       | 326  | 24  | 21 | 416  | 21.63% | -5.78% | -4.19% |
| <i>Df(3R)crb-F89-4</i> | 95D7-11;95F15    | 1241 | 149 | 28 | 1595 | 22.19% | -2.34% | -3.63% |
| <i>Df(3R)crb87-5</i>   | 95F6-8;96A18-20  | 1232 | 113 | 34 | 1526 | 19.27% | -0.24% | -6.55% |
| <i>Df(3R)Esp13</i>     | 96F1;97B1        | 356  | 105 | 5  | 576  | 38.19% | 2.99%  | 12.37% |
| <i>Df(3R)TI-P</i>      | 97A;98A1-2       | 260  | 52  | 4  | 372  | 30.11% | -1.17% | 4.29%  |

\*The percentage of X NDJ is significantly higher/lower than in  $X/X$ ;  $bubR1^{D1326N}/bubR1^{rev1}$  females (multinomial-Poisson hierarchy model,  $P < 0.05$ ).

<sup>(a)</sup> Difference between X NDJ of the deficiency-bearing flies vs. matched control.

<sup>(b)</sup> Difference between X NDJ of the deficiency-bearing flies vs. average controls.
