# Supplementary material for: polo Is Identified as a Suppressor of bubR1 Nondisjunction in a Deficiency Screen of the Third Chromosome in Drosophila melanogaster
Source: PubMed Central journal article supplement (PMC3276128; doi:10.1534/g3.111.000265), 2011-07-01
Supplement: supp_1.2.161_TableS2.pdf [file supp_1.2.161_TableS2.pdf]

**Table S2 Complementation tests of the deficiencies that affect *bubR1* X NDJ**

| Deficiency name used in the screen | Cytogenetic breakpoints             | Cross to | Deficiency used for the complementation test | Cytogenetic breakpoints | Result of the test |
|------------------------------------|-------------------------------------|----------|----------------------------------------------|-------------------------|--------------------|
| <i>Df(3L)BSC23</i>                 | 62E8;63B5-6                         | x        | <i>Df(3L)Exel6091</i>                        | 62E8;62F5               | lethal             |
|                                    |                                     | x        | <i>Df(3L)ED4288</i>                          | 63A6;63B7               | lethal             |
| <i>Df(3L)pbl-X1</i>                | 65F6;66B7-8                         | x        | <i>Df(3L)ZP1</i>                             | 66A17-20;66C1-5         | lethal             |
| <i>Df(3L)ZP1</i>                   | 66A17-20;66C1-5                     | x        | <i>Df(3L)66C-G28</i>                         | 66B8-9;66C9-10          | lethal             |
| <i>Df(3L)BSC13</i>                 | 66B12-C1;66D2-4                     | x        | <i>Df(3L)ZP1</i>                             | 66A17-20;66C1-5         | lethal             |
| <i>Df(3L)BSC10</i>                 | 69D4-5;69F5-7                       | x        | <i>Df(3L)eyg[C1]</i>                         | 69A4-5;69D4-6           | lethal             |
|                                    |                                     | x        | <i>Df(3L)iro-2</i>                           | 69B1-5;69D1-6           | lethal             |
|                                    |                                     | x        | <i>Df(3L)ED4486</i>                          | 69C4;69F6               | lethal             |
|                                    |                                     | x        | <i>Df(3L)Exel6117</i>                        | 69D1;69E2               | lethal             |
|                                    |                                     | x        | <i>Df(3L)E44</i>                             | 69D2;69E3-5             | lethal             |
|                                    |                                     | x        | <i>Syx13[01470]</i>                          | 69F6                    | viable             |
|                                    |                                     | x        | <i>Df(3L)BSC12</i>                           | 69F6-70A1;70A1-2        | viable             |
| <i>Df(3L)ED4674</i>                | 73B5;73E5                           | x        | <i>Df(3L)BSC561</i>                          | 73A2;73C1               | lethal             |
|                                    |                                     | x        | <i>Df(3L)Exel6130</i>                        | 73B5;73D1               | lethal             |
| <i>Df(3L)BSC8</i>                  | 74D3-75A1;75B2-5                    | x        | <i>Df(3L)BSC415</i>                          | 74A5;75A4               | lethal             |
|                                    |                                     | x        | <i>Df(3L)BSC775</i>                          | 75A2;75E4               | lethal             |
| <i>Df(3L)ED4858</i>                | 76D3;77C1                           | x        | <i>Df(3L)Exel6136</i>                        | 77B2;77C6               | lethal             |
| <i>Df(3L)rdgC-co2</i>              | 77A1;77D1                           | x        | <i>Df(3L)ED4858</i>                          | 76D3;77C1               | lethal             |
|                                    |                                     | x        | <i>Df(3L)ri-79c</i>                          | 77B-C;77F-78A           | lethal             |
|                                    |                                     | x        | <i>Df(3L)Exel6136</i>                        | 77B2;77C6               | lethal             |
| <i>Df(3L)Pc-2q</i>                 | 78C5-6;78E3-79A1                    | x        | <i>Df(3L)ME107</i>                           | 77F3;78C8-9             | viable             |
|                                    |                                     | x        | <i>Df(3L)Exel9065</i>                        | 78D4;78D5               | lethal             |
|                                    |                                     | x        | <i>Df(3L)Exel9066</i>                        | 78D5;78D6               | lethal             |
|                                    |                                     | x        | <i>Df(3L)ED4978</i>                          | 78D5;79A2               | lethal             |
| <i>Df(3L)ED4978</i>                | 78D5;79A2                           | x        | <i>Df(3L)Pc-2q</i>                           | 78C5-6;78E3-79A1        | lethal             |
|                                    |                                     | x        | <i>Df(3L)Exel9065</i>                        | 78D4;78D5               | viable             |
|                                    |                                     | x        | <i>Df(3L)Exel9066</i>                        | 78D5;78D6               | lethal             |
| <i>Df(3L)Ten-m-AL29</i>            | 79C1-3;79E3-8                       | x        | <i>Df(3L)ED230</i>                           | 79C2;80A4               | lethal             |
|                                    |                                     | x        | <i>Df(3L)HD1</i>                             | 79D3-E01;79F3-6         | lethal             |
|                                    |                                     | x        | <i>Df(3L)Exel6138</i>                        | 79D3;79E3               | lethal             |
|                                    |                                     | x        | <i>Df(3L)BSC21</i>                           | 79E5-F1;80A2-3          | lethal             |
| <i>Df(3R)ED5177</i>                | 83B4;83B6                           | x        | <i>Df(3R)Exel6144</i>                        | 83A6;83B6               | lethal             |
|                                    |                                     | x        | <i>Df(3R)BSC549</i>                          | 83A6;83B6               | lethal             |
| <i>Df(3R)Tpl10</i>                 | 83C1-2;84B1-2, 83D4-5;84A4-5;98F1-2 | x        | <i>Df(3R)BSC47</i>                           | 83B7-C1;83C6-D1         | lethal             |
|                                    |                                     | x        | <i>Df(3R)ED5197</i>                          | 83B7;83D2               | viable             |
|                                    |                                     | x        | <i>Df(3R)Exel7284</i>                        | 83C4;83D2               | viable             |
|                                    |                                     | x        | <i>Df(3R)Tpl6</i>                            | 83D1-2;84A4-5           | lethal             |
|                                    |                                     | x        | <i>Df(3R)WIN11</i>                           | 83E1-2;84A5             | lethal             |
|                                    |                                     | x        | <i>Df(3R)Scr</i>                             | 84A1-2;84B1-2           | lethal             |
|                                    |                                     | x        | <i>Df(3R)Antp17</i>                          | 84A5;84D9               | lethal             |
| <i>Df(3R)GB104</i>                 | 85D12;85E10                         | x        | <i>Df(3R)BSC476</i>                          | 85D16;85D24             | lethal             |
|                                    |                                     | x        | <i>Df(3R)Exel6153</i>                        | 85D19;85E1              | lethal             |
| <i>Df(3R)ED5559</i>                | 86E11;87B11                         | x        | <i>Df(3R)ED5577</i>                          | 86F9;87B13              | lethal             |

|                       |                   |   |                        |                 |        |
|-----------------------|-------------------|---|------------------------|-----------------|--------|
|                       |                   | x | <i>Df(3R)Exel7313</i>  | 87A9;87B5       | lethal |
| <i>Df(3R)sbd105</i>   | 88F9-89A1;89B9-10 | x | <i>Df(3R)Exel7327</i>  | 89A8;89B1       | viable |
| <i>Df(3R)ED5780</i>   | 89E11;90C1        | x | <i>Df(3R)Exel6176</i>  | 89E11;89F1      | lethal |
|                       |                   | x | <i>Df(3R)BSC790</i>    | 90B6;90E2       | lethal |
| <i>Df(3R)ED5942</i>   | 91F12;92B3        | x | <i>Df(3R)BSC475</i>    | 91F12;92B4      | lethal |
| <i>Df(3R)BSC56</i>    | 94E1-2;94F1-2     | x | <i>Df(3R)BSC55</i>     | 94D2-10;94E1-6  | lethal |
|                       |                   | x | <i>Df(3R)Exel6193</i>  | 94D3;94E4       | lethal |
|                       |                   | x | <i>Df(3R)ED6103</i>    | 94D3;94E9       | lethal |
|                       |                   | x | <i>Df(3R)Exel6274</i>  | 94E4;94E11      | lethal |
|                       |                   | x | <i>Df(3R)Exel6194</i>  | 94F1;95A4       | viable |
| <i>Df(3R)mbc-R1</i>   | 95A5-7;95D6-11    | x | <i>Df(3R)Exel6194</i>  | 94F1;95A4       | lethal |
|                       |                   | x | <i>Df(3R)mbc-30</i>    | 95A5-7;95C10-11 | lethal |
|                       |                   | x | <i>Df(3R)Exel9014</i>  | 95B1;95D1       | lethal |
|                       |                   | x | <i>Df(3R)Exel6196</i>  | 95C12;95D8      | lethal |
|                       |                   | x | <i>Df(3R)crb-F89-4</i> | 95D7-D11;95F15  | lethal |
|                       |                   | x | <i>Df(3R)Exel6197</i>  | 95D8;95E5       | lethal |
| <i>Df(3R)Exel6202</i> | 96D1;96D1         | x | <i>Df(3R)BSC849</i>    | 96D1;96E2       | lethal |
|                       |                   | x | <i>Df(3R)BSC522</i>    | 96D1;96E3       | lethal |
| <i>Df(3R)D605</i>     | 97E3;98A5         | x | <i>Df(3R)ED6255</i>    | 97D2;97F1       | lethal |
|                       |                   | x | <i>Df(3R)Exel6206</i>  | 97E1;97E5       | lethal |
|                       |                   | x | <i>Df(3R)ED6265</i>    | 97E2;98A7       | lethal |
|                       |                   | x | <i>Df(3R)ED6237</i>    | 97E4;97E11      | lethal |
|                       |                   | x | <i>Df(3R)IR16</i>      | 97F1-2;98A      | lethal |
| <i>Df(3R)BSC42</i>    | 98B1-2;98B3-5     | x | <i>Df(3R)BSC498</i>    | 98A4;98B5       | lethal |
|                       |                   | x | <i>Df(3R)BSC499</i>    | 98A14;98B5      | lethal |
| <i>Df(3R)3450</i>     | 98E3;99A6-8       | x | <i>Df(3R)Exel6210</i>  | 98E1;98F5       | lethal |
|                       |                   | x | <i>Df(3R)ED6310</i>    | 98F12;99B2      | lethal |
|                       |                   | x | <i>Df(3R)ED6316</i>    | 99A5;99C1       | lethal |

lethal – the two deficiencies do not complement each other

viable – the two deficiencies complement each other
