# Supplementary material for: polo Is Identified as a Suppressor of bubR1 Nondisjunction in a Deficiency Screen of the Third Chromosome in Drosophila melanogaster
Source: PubMed Central journal article supplement (PMC3276128; doi:10.1534/g3.111.000265), 2011-07-01
Supplement: supp_1.2.161_TableS3.pdf [file supp_1.2.161_TableS3.pdf]

**Table S3 Refining the mapping of *bubR1* modifiers**

| Female genotype                                                            | Breakpoint  | Normal progeny |      | Exceptional progeny |      | Total adjusted progeny | X NDJ   |
|----------------------------------------------------------------------------|-------------|----------------|------|---------------------|------|------------------------|---------|
|                                                                            |             | X/XY & X/O     | XX/O | O/XY                | O/XY |                        |         |
| <i>Df(3R)D605</i> – enhancer                                               |             |                |      |                     |      |                        |         |
| <i>Df(3R)D605/+</i>                                                        |             | 2033           | 1    | 0                   |      | 2035                   | 0.10%   |
| <i>bubR1<sup>D1326N</sup>/bubR1<sup>rev1</sup></i>                         |             | 3271           | 194  | 156                 |      | 3971                   | 17.63%  |
| <i>bubR1<sup>D1326N</sup>/bubR1<sup>rev1</sup>; Df(3R)D605/+</i>           | 97E2;98A3-4 | 1010           | 213  | 26                  |      | 1488                   | 32.12%* |
| <i>bubR1<sup>D1326N</sup>/bubR1<sup>rev1</sup>; Df(3R)ED6255/+</i>         | 97D2;97F1   | 2720           | 157  | 61                  |      | 3156                   | 13.81%  |
| <i>bubR1<sup>D1326N</sup>/bubR1<sup>rev1</sup>; Df(3R)Exel6206/+</i>       | 97E1;97E5   | 1233           | 107  | 26                  |      | 1499                   | 17.75%  |
| <i>bubR1<sup>D1326N</sup>/bubR1<sup>rev1</sup>; Df(3R)ED6265/+</i>         | 97E2;98A7   | 990            | 216  | 118                 |      | 1658                   | 40.29%* |
| <i>bubR1<sup>D1326N</sup>/bubR1<sup>rev1</sup>; Df(3R)ED6237/+</i>         | 97E4;97E11  | 2648           | 214  | 98                  |      | 3272                   | 19.07%  |
| <i>bubR1<sup>D1326N</sup>/bubR1<sup>rev1</sup>; Df(3R)IR16/+</i>           | 97F1-2;98A  | 1934           | 222  | 80                  |      | 2538                   | 23.80%  |
| <i>Df(3R)ED5559</i> – suppressor                                           |             |                |      |                     |      |                        |         |
| <i>bubR1<sup>D1326N</sup>/bubR1<sup>rev1</sup></i>                         |             | 1452           | 149  | 48                  |      | 1846                   | 21.34%  |
| <i>bubR1<sup>D1326N</sup>/bubR1<sup>rev1</sup>; Df(3R)ED5559/+</i>         | 86E11;87B11 | 270            | 0    | 0                   |      | 270                    | 0.00%*  |
| <i>bubR1<sup>D1326N</sup>/bubR1<sup>rev1</sup>; Df(3R)ED5516/+</i>         | 86D8;86E13  | 651            | 61   | 19                  |      | 811                    | 19.73%  |
| <i>bubR1<sup>D1326N</sup>/bubR1<sup>rev1</sup>; Df(3R)Exel8154/+</i>       | 86E13;86E18 | 582            | 52   | 16                  |      | 718                    | 18.94%  |
| <i>bubR1<sup>D1326N</sup>/bubR1<sup>rev1</sup>; Df(3R)Exel7310/+</i>       | 86E18;87A1  | 863            | 85   | 21                  |      | 1075                   | 19.72%  |
| <i>bubR1<sup>D1326N</sup>/bubR1<sup>rev1</sup>; Df(3R)ED5577/+</i>         | 86F9;87B13  | 1506           | 0    | 1                   |      | 1508                   | 0.13%*  |
| <i>bubR1<sup>D1326N</sup>/bubR1<sup>rev1</sup>; aur<sup>1</sup>/+</i>      |             | 1562           | 160  | 28                  |      | 1938                   | 19.40%  |
| <i>bubR1<sup>D1326N</sup>/bubR1<sup>rev1</sup>; aur<sup>87Ac-3</sup>/+</i> |             | 1302           | 119  | 28                  |      | 1596                   | 18.42%  |

\*The percentage of X NDJ is significantly higher/lower than in *X/X;bubR1<sup>D1326N</sup>/bubR1<sup>rev1</sup>* females (multinomial-Poisson hierarchy model,  $P < 0.05$ ).
